# Supplementary material for: Amide-bridged conjugated organic polymers: efficient metal-free catalysts for visible-light-driven CO2 reduction with H2O to CO
Source: Royal Society of Chemistry journal article supplement (doi:10.1039/d1sc02499j), 2021-01-01
Supplement: d1sc02499j1.pdf [file d1sc02499j1.pdf]

## ***Supporting Information for***

### **Amide-Bridged Conjugated Organic Polymers: Efficient Metal-Free**

### **Catalysts for Visible-Light-Driven CO<sub>2</sub> Reduction with H<sub>2</sub>O to CO**

Fan Wen,<sup>‡ac</sup> Fengtao Zhang,<sup>‡ab</sup> Zhen Wang,<sup>ab</sup> Xiaoxiao Yu,<sup>ab</sup> Guipeng Ji,<sup>a</sup> Dongyang Li,<sup>ac</sup>  
Shengrui Tong,<sup>a</sup> Yingbin Wang,<sup>c</sup> Buxing Han,<sup>ab</sup> Zhimin Liu<sup>\*ab</sup>

---

a Beijing National Laboratory for Molecular Sciences, Key Laboratory of Colloid and Interface and Thermodynamics, CAS, Research/Education Center for Excellence in Molecular Sciences, Institute of Chemistry, Chinese Academy of Sciences, 100190 Beijing (P. R. China). E-mail: liuzm@iccas.ac.cn.

b School of Chemistry, University of Chinese Academy of Sciences, Beijing 100049 (P. R. China)

c School of Science, China University of Geosciences, Beijing, 100083 (P. R. China)

‡ These authors contributed equally

## Characterization

FTIR spectra of the samples were collected on a TENSOR 27 FTIR at a resolution of  $2\text{ cm}^{-1}$ . Solid-state NMR experiments were performed on a Bruker WB Avance II 400 MHz spectrometer. The  $^{13}\text{C}$  CP/MAS NMR spectra were recorded with a 4 mm double-resonance MAS probe and with a sample spinning rate of 10.0 kHz; a contact time of 2 ms (ramp 100) and pulse delay of 3 s were applied. X-ray photoelectron spectroscopy (XPS) was performed on an ESCAL Lab 220i-XL spectrometer at a pressure of  $\sim 3 \times 10^{-9}$  mbar (1 mbar = 100 Pa) using Al  $K_{\alpha}$  as the excitation source (1486.6 eV) and operated at 15 kV and 20 mA. The binding energies were referenced to the C 1s line at 284.8 eV from adventitious carbon. Field emission scanning electron microscopy (SEM) observations were performed on a Hitachi S-4800 microscope operated at an accelerating voltage of 15.0 kV. Transmission electron microscopy (TEM) images were obtained with a JEOL JEM-1011 and Hitachi HT7700 instrument operated at 200 kV. Gas sorption isotherms were obtained with Micromeritics TriStar II 3020 and Micromeritics ASAP 2020 M+C accelerated surface area and porosimetry analyzers at certain temperature. The samples were outgassed at 150 °C for 8 h before the measurements. Surface areas were calculated from the adsorption data using Brunauer-Emmett-Teller (BET) methods. The pore-size-distribution curves were obtained from the adsorption branches using Barrett-Joyner-Halenda (BJH) method. The XRD analysis was performed on a D/MAX-RC diffractometer operating at 30 kV and 100 mA with Cu  $K_{\alpha}$  radiation. The UV-vis diffused reflectance spectra (UV-DRS) were collected on UV-2600 using  $\text{BaSO}_4$  as a reference. PL emission spectra were obtained on FluoroMax+ fluorescence spectrophotometer with 370 nm excitation (HORIBA, United States). The time-resolved fluorescent decay spectroscopy was performed on FLS980 with 405 nm excitation (Edinburgh Instruments, UK). The reaction mixture was analyzed by means of GC (Agilent 7890B) equipped with a TCD detector and a packed column (carbon molecular sieve TDX-01, 3 mm in diameter and 1 m in length) using argon as the carrier gas. The column oven was temperature-programmed with a 2 min initial hold at 333 K, followed by the temperature increase to 473 K at a rate of 20 K/min and kept at 273 K for 21 min. The in situ FTIR spectra were recorded in the range from 4000 to  $650\text{ cm}^{-1}$  with a Nicolet FTIR Spectrometer 6700 equipped with a liquid-nitrogen-cooled narrow band mercury-cadmium-telluride (MCT) detector.

## Photoelectrochemical characterization

Electrochemical measurements were conducted with a CorrTest electrochemical station in a conventional three-electrode cell, using a Pt plate as the counter electrode and a 3 mol/L Ag/AgCl as the reference electrode. The working electrode was prepared by spreading aqueous slurry of photocatalyst (50  $\mu\text{L}$ ) over ITO glass substrate, and the coated area was fixed at  $1\text{ cm}^2$ . The suspension was prepared by dispersing photocatalyst (50 mg) with Nafion solution in ethanol (1 wt %, 2 mL). The working electrode was irradiated from its back. The supporting electrolyte was an aqueous solution of  $\text{Na}_2\text{SO}_4$  (0.2 M), which was purged with nitrogen for 1.5 h before measurement.

### **Computational methods**

All DFT calculations in this study were performed using Gaussian 09 package.<sup>1</sup> The M06-2X functional with def-tzvp basis set was employed, coupled with Grimme's D3 dispersion correction to perform geometry optimization.<sup>2</sup> All calculated structures were verified with no imaginary frequency (IF). Besides, an ultrafine integration grid (99,590) was used for numerical integrations. Thermal corrections were carried out with harmonic frequency analysis using Shermo code on optimized structures under T=298.15 K and 1 atm pressure.<sup>3</sup> The binding energies were evaluated at M06-2X functional with def2tzvp basis set according to the previous optimized structures. NAO were carried out by Natural bond orbital (NBO) analysis to obtain the composition of atomic orbitals of each atom in HOMO and LUMO.<sup>4</sup> The VESTA molecular visualizing program was employed to draw 3D molecular structures,<sup>5</sup> the VMD<sup>6</sup> and Multiwfn<sup>7</sup> program was employed to perform analysis of electrostatic potential (ESP) energy and draw picture.

## Results of Characterizations

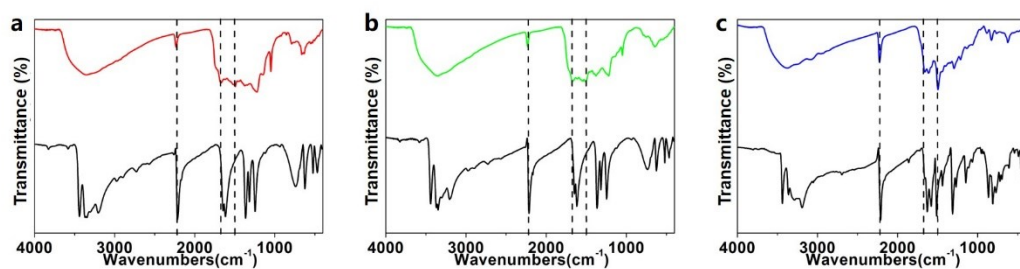

**Fig. S1** FT-IR spectra of (a) DAMN and Amide-DAMN, (b) DAEN and Amide-DAEN, (c) 34AB and Amide-34AB.

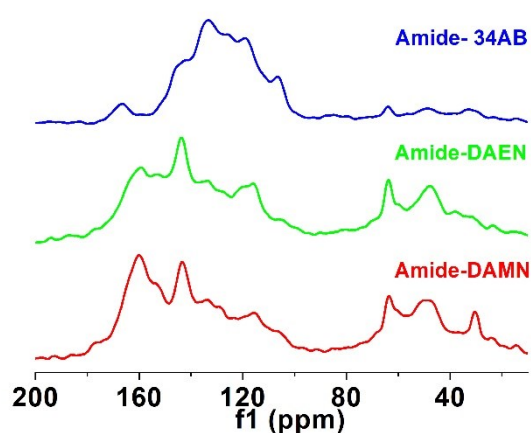

**Fig. S2** (CP/MAS)  $^{13}\text{C}$  NMR spectra of Amide-COPs.

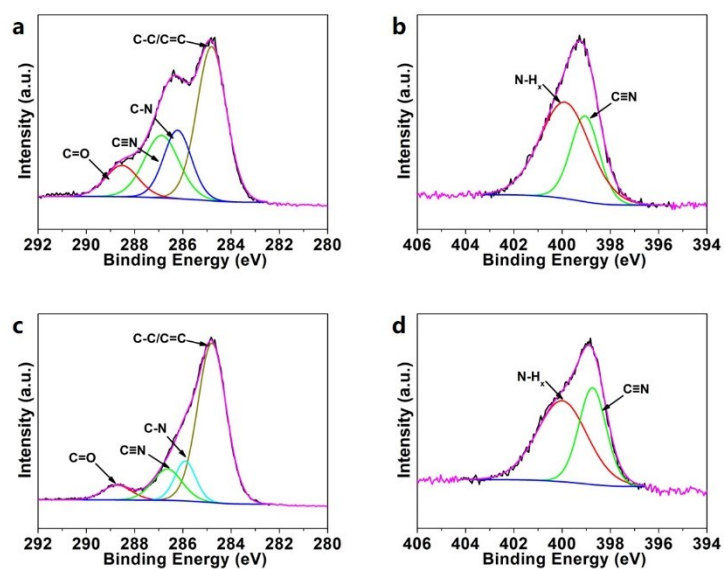

**Fig. S3** XPS spectra of (a) C 1s and (b) N 1s for Amide-DAEN. XPS spectra of (c) C 1s and (d) N 1s for Amide-34AB.

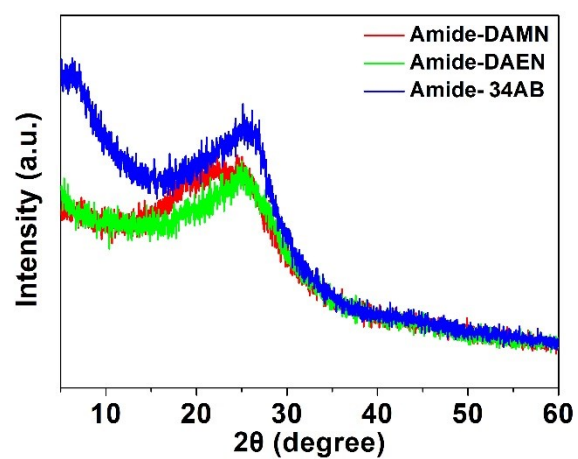

**Fig. S4** Powder X-ray diffraction spectra of Amide-COPs.

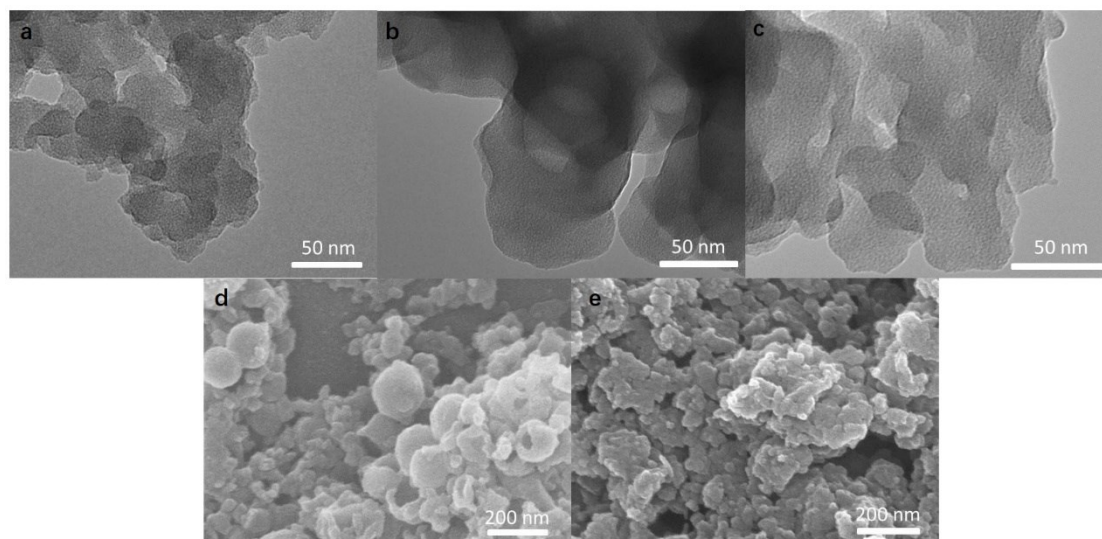

**Fig. S5** (a) TEM of Amide-DAMN. (b) TEM and (d) SEM of Amide-DAEN. (c) TEM and (e) SEM of Amide-34AB.

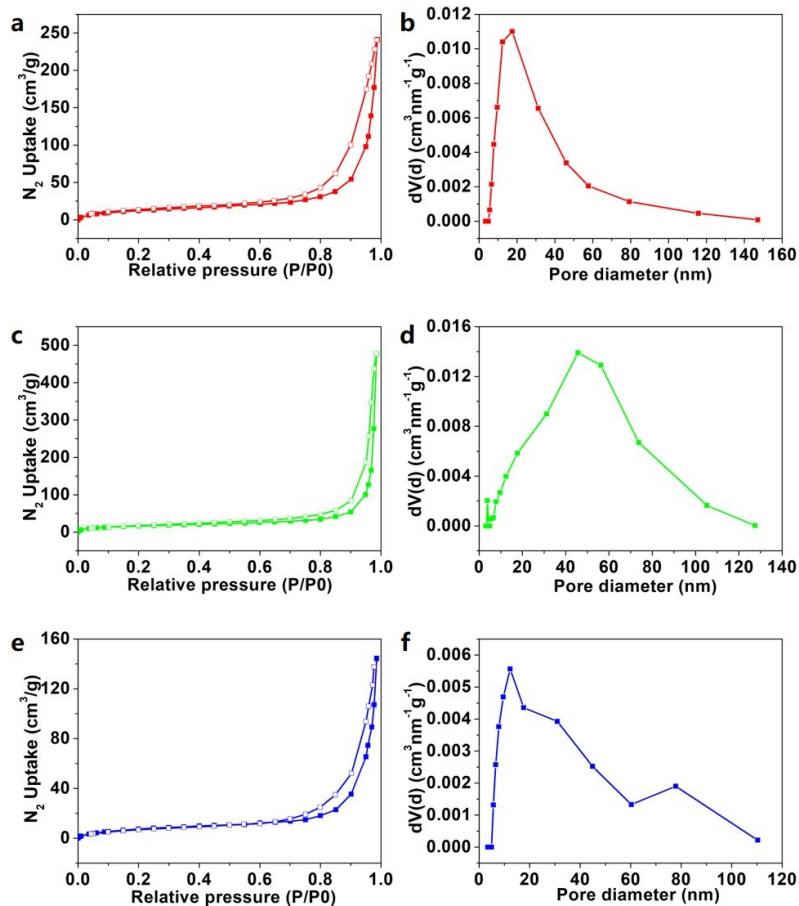

**Fig. S6** (a) Adsorption (filled) and desorption (empty) isotherms of  $N_2$  at 77 k for Amide-DAMN. (b) BJH pore size distribution of Amide-DAMN. (c) Adsorption (filled) and desorption (empty) isotherms of  $N_2$  at 77 k for Amide-DAEN. (d) BJH pore size distribution of Amide-DAEN. (e) Adsorption (filled) and desorption (empty) isotherms of  $N_2$  at 77 k for Amide-34AB. (f) BJH pore size distribution of Amide-34AB.

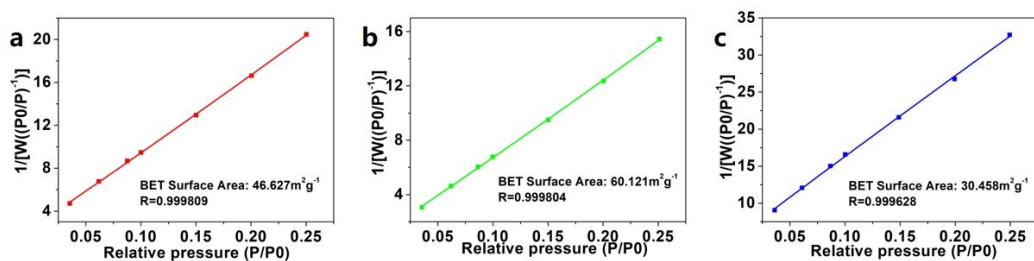

**Fig. S7** BET plot of (a) Amide-DAMN, (b) Amide-DAEN and (c) Amide-34AB.

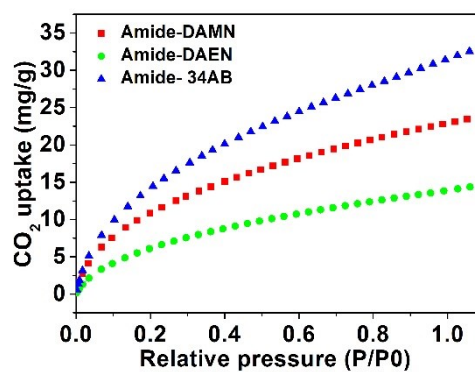

**Fig. S8** CO<sub>2</sub> adsorption capacity isotherms of Amide-COPs at 273 K.

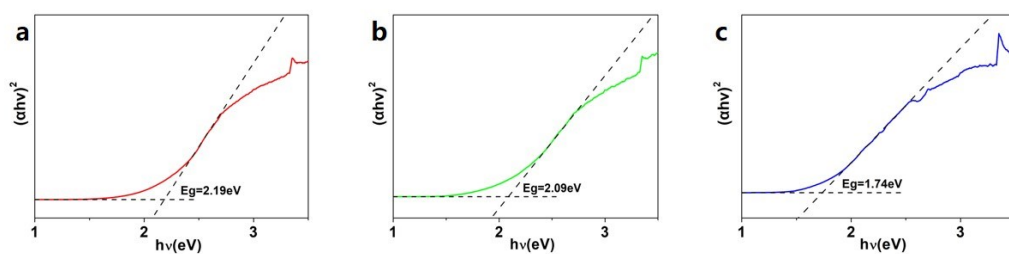

**Fig. S9** Tauc plots together with the bandgaps for: (a) Amide-DAMN, (b) Amide-DAEN and (c) Amide-34AB.

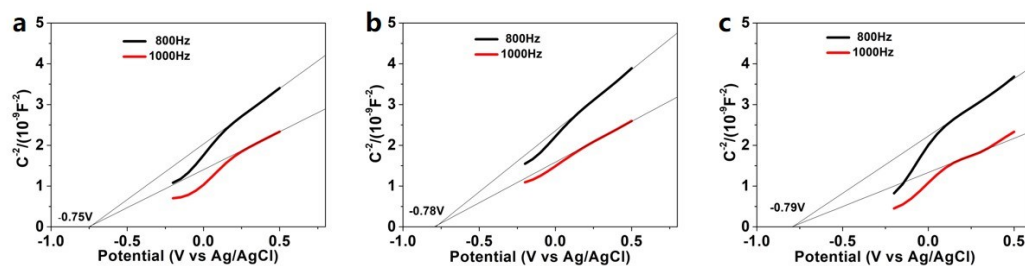

**Fig. S10** Mott-Schottky plots of Amide-COPs. Electrode in 0.2 M Na<sub>2</sub>SO<sub>4</sub> (pH=6.8). (a) Amide-DAMN, (b) Amide-DAEN and (c) Amide-34AB.

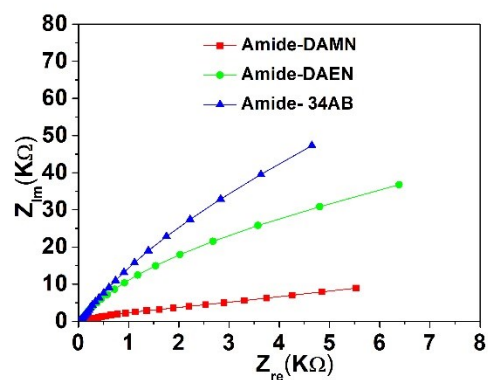

**Fig. S11** EIS spectra of Amide-COPs at 0.01 V bias potential vs Ag/AgCl in 0.2 M  $Na_2SO_4$  (pH=6.8).

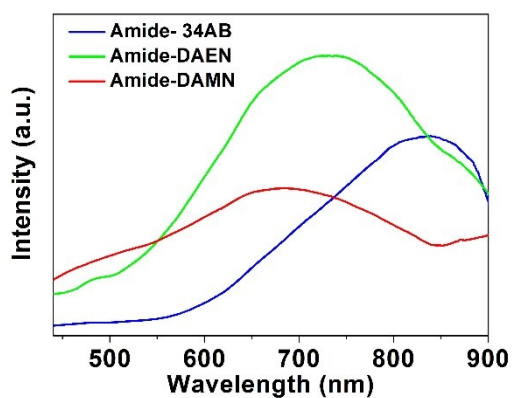

**Fig. S12** Photoluminescence spectra of Amide-COPs at room temperature.

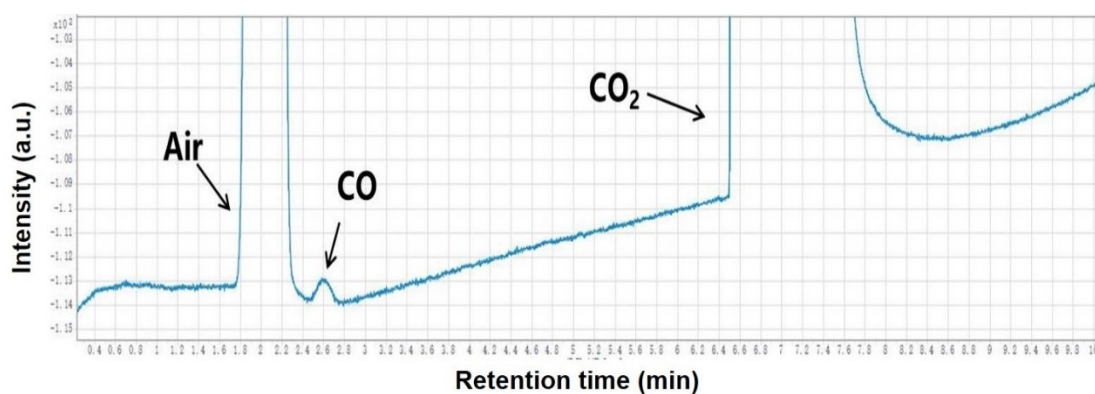

**Fig. S13** Typical GC spectrum of  $CO_2$  photoreduction products over Amide-DAMN. Retention time: 0.78 min ( $H_2$ ), 1.76 min (Air), 2.48 min (CO), 4.55 min ( $CH_4$ ) and 6.51 min ( $CO_2$ ).



**Table S1.** Comparison with other photocatalysts and photocatalytic systems employed for CO<sub>2</sub> reduction under visible light irradiation.

| Photocatalyst            | Reaction conditions              | Main reaction products (μmol/g/h) | Main reaction selectivity /% | Reference         |
|--------------------------|----------------------------------|-----------------------------------|------------------------------|-------------------|
| NOP-COP                  | 300 W Xe lamp (λ>420 nm)<br>TEOA | CH <sub>4</sub> : 22.5            | 90.2                         | 8                 |
| PEosinY-1                | 300 W Xe lamp (λ>420 nm)         | CO: 33                            | 92                           | 9                 |
| TTCOF-Zn                 | 300 W Xe lamp (800 nm>λ>420 nm)  | CO: 2.06                          | 100                          | 10                |
| CdS/N-doped graphene     | 350 W Xe lamp (λ>420 nm)         | CO: 2.59                          | 88.7                         | 11                |
| HCP-TiO <sub>2</sub> -FG | 300 W Xe lamp (λ>420 nm)         | CH <sub>4</sub> : 27.62           | 56.1                         | 12                |
| Amide-DAMN               | 300 W Xe lamp (λ>420 nm)         | CO: 20.6                          | 100                          | <i>This work.</i> |
| Amide-DAEN               | 300 W Xe lamp (λ>420 nm)         | CO: 16.3                          | 100                          | <i>This work.</i> |

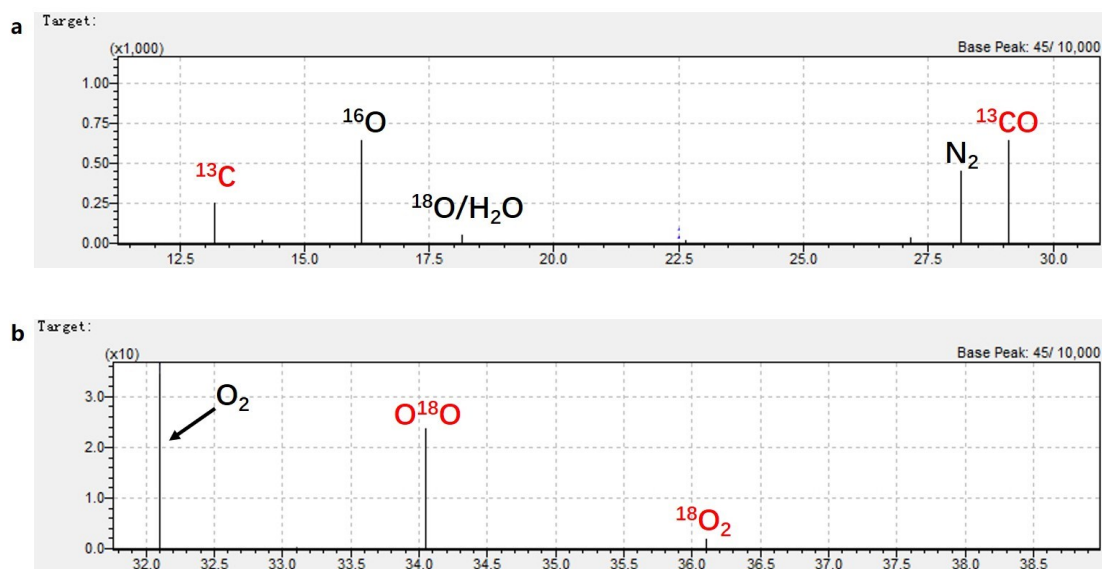

**Fig. S14** (a) GC-MS spectrum of <sup>13</sup>CO generated from the photocatalytic reaction of <sup>13</sup>CO<sub>2</sub> over Amide-DAMN under visible light irradiation. (b) GC-MS spectrum of O<sup>18</sup>O and <sup>18</sup>O<sub>2</sub> generated from the photocatalytic reaction of H<sub>2</sub><sup>18</sup>O over Amide-DAMN under visible light irradiation.

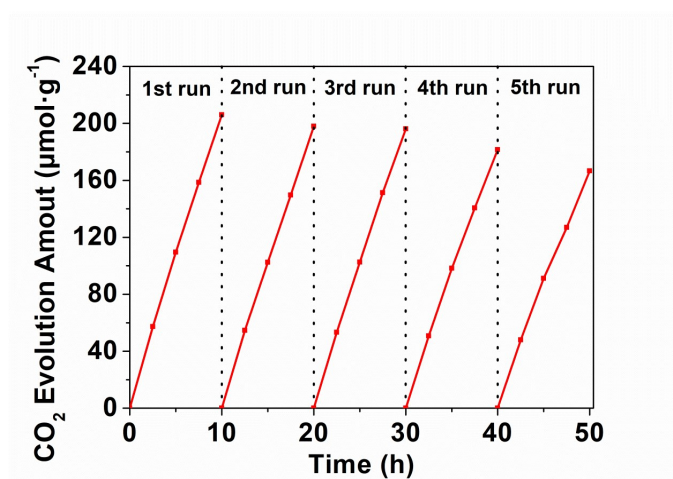

Fig. S15 Recyclability test of Amide-DAMN under visible light irradiation.

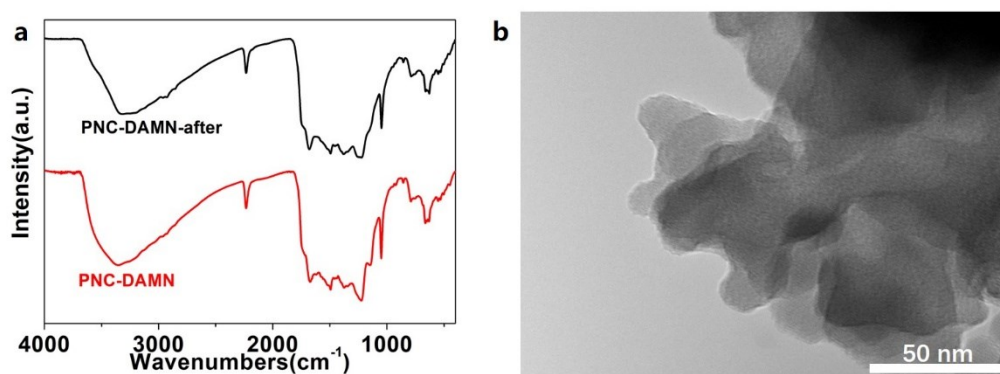

Fig. S16 (a) FT-IR spectra of Amide-DAMN and Amide-DAMN-after recorded as KBr pellets. (b) TEM image of Amide-DAMN sample after photocatalytic reaction.

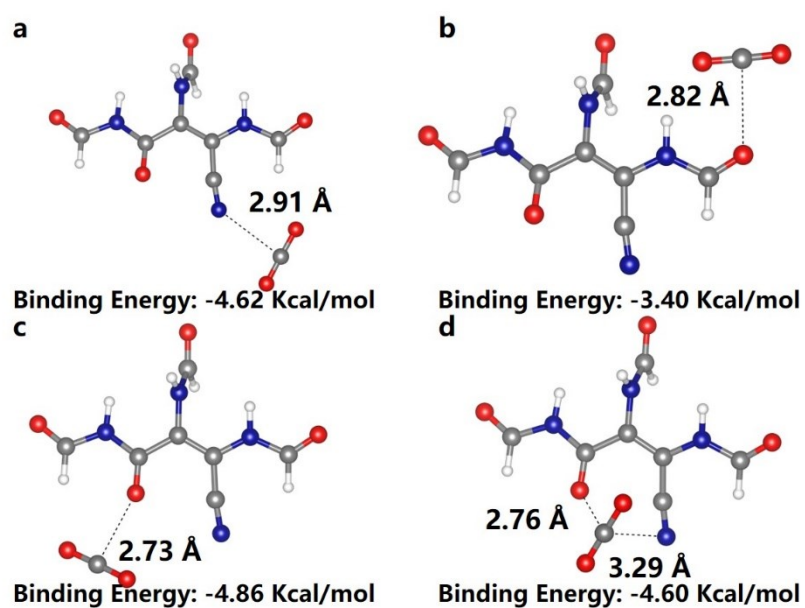

Fig. S17 The binding distance and binding energy between cyano or carbonyl groups in S-1 and CO<sub>2</sub>.

**Table S2.** The details of the HOMO composition of S-1 and orbital compositions of the atoms.

| Center | Composition/% | Center | Composition/% | Center | Composition/% |
|--------|---------------|--------|---------------|--------|---------------|
| 1(C)   | 9.191         | 8(C)   | 0.142         | 15(H)  | 0.429         |
| 2(C)   | 0.257         | 9(O)   | 9.694         | 16(H)  | 0             |
| 3(O)   | 5.570         | 10(O)  | 3.376         | 17(H)  | 0             |
| 4(C)   | 0.331         | 11(N)  | 1.725         | 18(C)  | 0.016         |
| 5(N)   | 4.888         | 12(N)  | 3.473         | 19(H)  | 0.020         |
| 6(N)   | 23.823        | 13(H)  | 1.259         | 20(O)  | 1.102         |
| 7(C)   | 0.632         | 14(H)  | 0.016         | 21(C)  | 33.137        |

**Table S3.** The details of the LUMO composition of S-1 and orbital compositions of the atoms.

| Center | Composition/% | Center | Composition/% | Center | Composition/% |
|--------|---------------|--------|---------------|--------|---------------|
| 1(C)   | 26.641        | 8(C)   | 4.309         | 15(H)  | 0.049         |
| 2(C)   | 9.861         | 9(O)   | 4.221         | 16(H)  | 0             |
| 3(O)   | 7.958         | 10(O)  | 0.155         | 17(H)  | 0             |
| 4(C)   | 3.376         | 11(N)  | 1.465         | 18(C)  | 2.614         |
| 5(N)   | 0.141         | 12(N)  | 11.850        | 19(H)  | 0             |
| 6(N)   | 3.358         | 13(H)  | 0.753         | 20(O)  | 2.569         |
| 7(C)   | 0.611         | 14(H)  | 0.002         | 21(C)  | 16.864        |

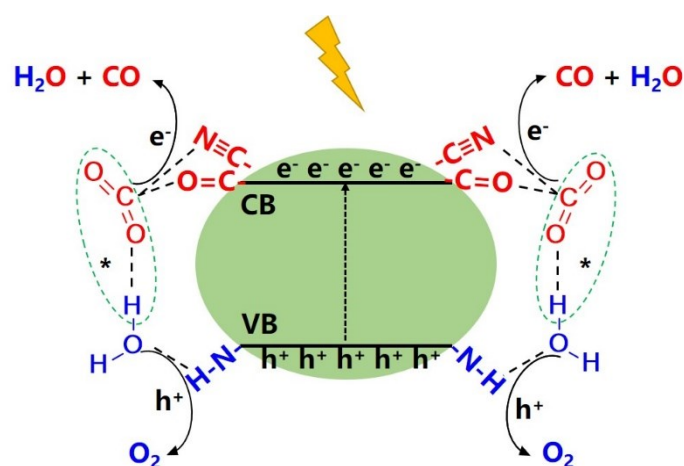

**Fig. S18** Schematic of the mechanism of Amide-COPs CO<sub>2</sub>RR with H<sub>2</sub>O oxidation.

## References

- [1] Gaussian 09, Revision D.01, M. J. Frisch, G. W. Trucks, H. B. Schlegel, G. E. Scuseria, M. A. Robb, J. R. Cheeseman, G. Scalmani, V. Barone, G. A. Petersson, H. Nakatsuji, X. Li, M. Caricato, A. Marenich, J. Bloino, B. G. Janesko, R. Gomperts, B. Mennucci, H. P. Hratchian, J. V. Ortiz, A. F. Izmaylov, J. L. Sonnenberg, D. Williams-Young, F. Ding, F. Lipparini, F. Egidi, J. Goings, B. Peng, A. Petrone, T. Henderson, D. Ranasinghe, V. G. Zakrzewski, J. Gao, N. Rega, G. Zheng, W. Liang, M. Hada, M. Ehara, K. Toyota, R. Fukuda, J. Hasegawa, M. Ishida, T. Nakajima, Y. Honda, O. Kitao, H. Nakai, T. Vreven, K. Throssell, J. A. Montgomery, Jr., J. E. Peralta, F. Ogliaro, M. Bearpark, J. J. Heyd, E. Brothers, K. N. Kudin, V. N. Staroverov, T. Keith, R. Kobayashi, J. Normand, K. Raghavachari, A. Rendell, J. C. Burant, S. S. Iyengar, J. Tomasi, M. Cossi, J. M. Millam, M. Klene, C. Adamo, R. Cammi, J. W. Ochterski, R. L. Martin, K. Morokuma, O. Farkas, J. B. Foresman, and D. J. Fox, Gaussian, Inc., Wallingford CT, 2016.
- [2] E. Caldeweyher, C. Bannwarth, S. Grimme, *The Journal of Chemical Physics*, 2017, **147**, 034112
- [3] T. Lu, Q. Chen, *ChemRxiv*, 2020, DOI: 10.26434/chemrxiv.12278801.v1
- [4] E. D. Iendening, J. K. Badenhoop, A. E. Reed, J. E. Carpenter, J. A. Bohmann, C. M. Morales F. Weinhold, Theoretical Chemistry Institute: University of Wisconsin, Madison, 2001.
- [5] K. Momma, F. Izumi, *J. Appl. Crystallogr.*, 2011, **44**, 1272–1276.
- [6] Y. Yamada, S. Gohda, K. Abe, T. Togo, N. Shimano, T. Sasaki, H. Tanaka, H. Ono, T. Ohba, S. Kubo, T. Ohkubo, S. Sato, *Carbon N. Y.*, 2017, **122**, 694–701.
- [7] T. Lu, F. Chen, *J. Comput. Chem.*, 2012, **33**, 580–592.
- [8] S. Guo, H. Zhang, Y. Chen, Z. Liu, B. Yu, Y. Zhao, Z. Yang, B. Han, Z. Liu, *ACS Catal.*, 2018, **8**, 4576–4581.
- [9] X. Yu, Z. Yang, B. Qiu, S. Guo, P. Yang, B. Yu, H. Zhang, Y. Zhao, X. Yang, B. Han, Z. Liu, *Angew. Chem., Int. Ed.*, 2019, **58**, 632–636.
- [10] M. Lu, J. Liu, Q. Li, M. Zhang, M. Liu, J.-L. Wang, D.-Q. Yuan, Y.-Q. Lan, *Angew. Chem., Int. Ed.*, 2019, **58**, 12392–12397.
- [11] C. Bie, B. Zhu, F. Xu, L. Zhang, J. Yu, *Adv. Mater.*, 2019, **31**, 1902868.
- [12] S. Wang, M. Xu, T. Peng, C. Zhang, T. Li, I. Hussain, J. Wang, B. Tan, *Nat. Commun.*, 2019, **10**, 676.
